# Supplementary material
Source: PubMed Central journal article supplement (PMC4209997)
Supplement: pnas.201407131SI.pdf [file pnas.201407131SI.pdf]

# Supporting Information

Cao et al. 10.1073/pnas.1407131111

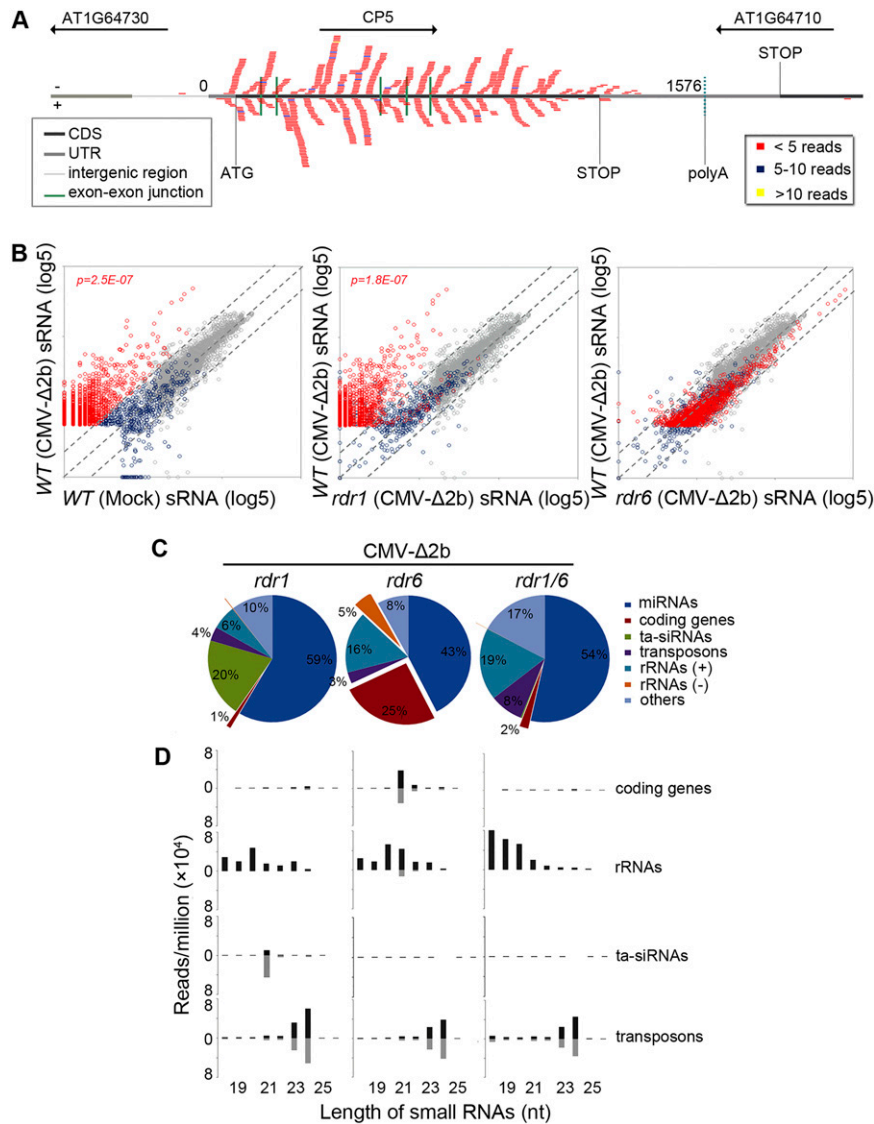

**Fig. S1.** Properties and biogenesis of vasiRNAs. (A) Distribution patterns of sense (bottom) and antisense (top) vasiRNAs specific to the RDR1 target gene encoding membrane related protein CP5 (CP5). Various regions of the target gene and the neighboring gene(s) are indicated by colored lines. Only the mature mRNA is shown with exon junctions represented by green vertical lines. CDS, the protein-coding region; UTR, untranslated region. (B) Scatter plots depicting locus-by-locus comparisons of small RNA (sRNA) abundance between pairs of small RNA libraries, with the 1,172 RDR1 target genes labeled as red circles and transposons and the remaining genes as gray and blue circles, respectively. The x and y values of each circle corresponded to the number of small RNA reads from this locus in the respective libraries. The loci within the outside pair of the dotted lines exhibited less than threefold difference in the abundance of the locus-specific small RNAs between the two libraries. (C) Relative abundance of total *Arabidopsis* small RNAs divided in specific sequence groups from *rdr1*, *rdr6*, or *rdr1 rdr6* plants after CMV-Δ2b infection. (D) Length distribution (in nucleotides) and abundance (reads per million of total reads) of the total *Arabidopsis* small RNAs derived from protein-coding genes, rRNAs, tasiRNAs, and transposons from *rdr1*, *rdr6*, or *rdr1 rdr6* plants after CMV-Δ2b infection.

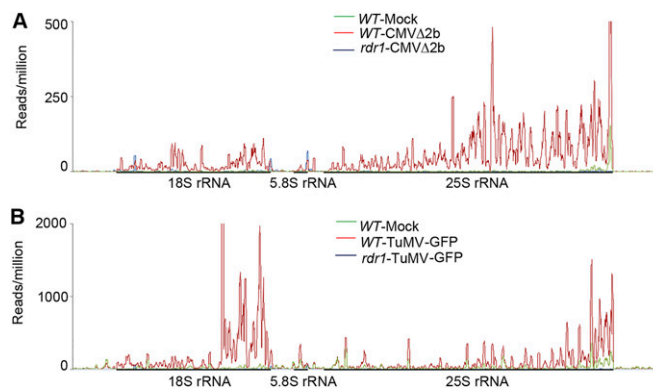

**Fig. S2.** Distribution patterns of antisense vasiRNAs derived from the 45S ribosomal DNA (rDNA) locus that encodes the 5.8S, 18S, and 25S rRNAs in mock-inoculated wild type (WT) plants and in WT and *rdr1* plants after infection (A) with CMV- $\Delta$ 2b of the Fny strain or (B) with the recombinant isolate of TuMV that expresses green fluorescent protein (TuMV-GFP).

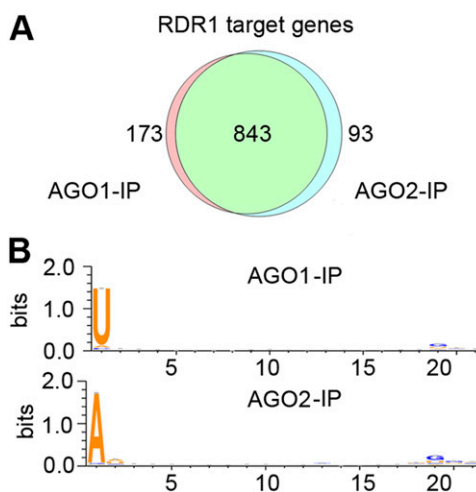

**Fig. S3.** Enrichment and properties of vasiRNAs in AGO1 and AGO2 complexes. (A) Venn diagram depicting the proportion of the 1172 RDR1 target loci that are enriched twofold or more in both of the AGO1 and AGO2 complexes coimmunoprecipitated (IP) from WT plants after CMV- $\Delta$ 2b infection. (B) The 5' terminal nucleotide bias of vasiRNAs loaded into AGO1 and AGO2 examined by Weblogo software.

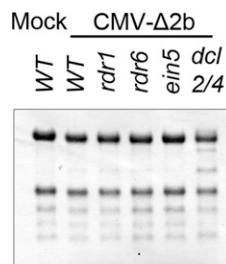

**Fig. S4.** Infection with CMV- $\Delta$ 2b did not induce RDR1-dependent changes in the accumulation of rRNAs in *Arabidopsis* plants. WT, *rdr1*, *rdr6*, *ein5*, and *dcl2/dcl4* mutant seedlings were inoculated with CMV- $\Delta$ 2b virions (5  $\mu$ g/mL) as described for Fig. 3 B–D. Two weeks after infection, the upper systemically infected leaves were harvested from the inoculated plants and the fresh tissues weighted before the extraction of total RNAs. High molecular weight RNAs from 10 mg fresh tissues of each sample were loaded in each lane and fractionated by denaturing agarose gel electrophoresis. The experiments were repeated multiple times, and a representative gel stained by methylene blue was shown. The two dominant RNA bands corresponded to 25S and 18S rRNA. Lane 1 contained total RNAs from WT plants inoculated with buffer (mock).

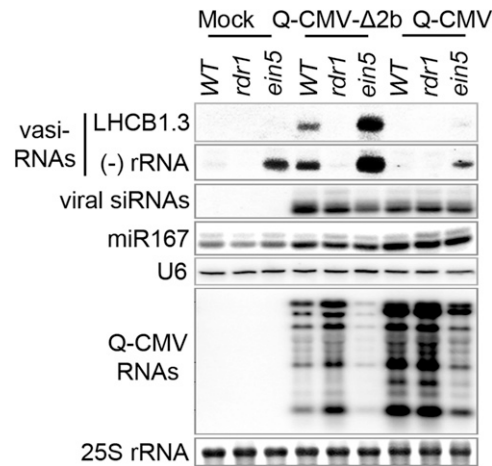

**Fig. S5.** Production of vasiRNAs induced by Q strain of CMV was RDR1 dependent and was enhanced by the presence of the null allele (*ein5-6*) of *Arabidopsis* exoribonuclease gene *XRN4/EIN5*. The accumulation of vasiRNAs derived from LHCB1.3 and the antisense 25S rRNA in WT, *rdr1*, and *ein5* plants after infection with the Q strain of CMV and its CMV-Δ2b was detected by Northern blotting analysis. Viral siRNAs, miR167, and U6 RNA as well as the Q-CMV RNAs were also probed.

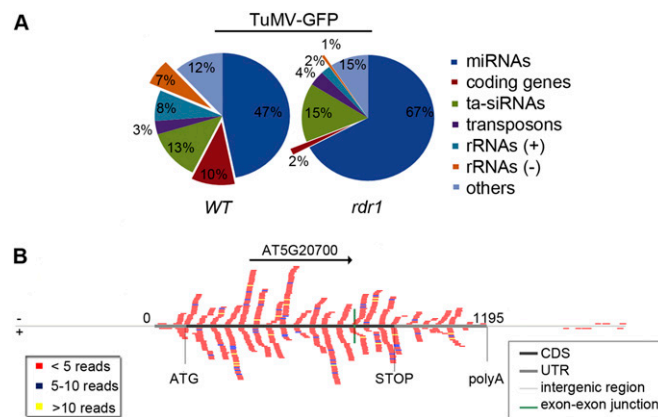

**Fig. S6.** Properties of vasiRNAs induced by TuMV-GFP. (A) Relative abundance of the total 21-nt RNAs from different sequence groups in WT and *rdr1* plants after infection by the TuMV-GFP isolate. (B) Distribution patterns of sense (bottom) and antisense (top) vasiRNAs specific to one of RDR1 target genes, AT5G20700, in the TuMV-GFP-infected WT plants. Various regions of the target gene and the neighboring gene(s) are indicated by colored lines. Only the mature mRNA is shown, with exon junctions represented by green vertical lines. CDS, the protein-coding region; UTR, untranslated region.



**Table S1. Probes and primers used in this paper**

| Primer or probe                                            | Sequence (5'-3')                                              |
|------------------------------------------------------------|---------------------------------------------------------------|
| Probes used for Northern blot detection of host small RNAs |                                                               |
| DNA oligo probe                                            |                                                               |
| LHCB1.3-130-180-R                                          | AGTCTTCCTCATTGTACACGCGCCGCTTCCAAGGACTTCAGATGCCGCGG            |
| LHCB1.3-200-250-F                                          | ATCAGGCAGCCCATGGTACGGATCTGACCGTGTCAAGTACTTGGGTCCAT            |
| LHCB1.3-250-300-F                                          | TCTCTGGCGAATCACCGAGCTACCTTACC GGAGAGTTC CCGGAGACTAC           |
| LHCB1.3-330-380-F                                          | CCCAGACATTGCGAAGGAACCGTGAAGTACTAGAAAGTTATCCACAGCAGGTG         |
| LHCB1.3-460-510-R                                          | TCCCAAGTAATCGAGCCCTCCATCGCTGAAGATCTGTGAACCGGCCTTGA            |
| LHCB1.3-390-440-R                                          | TTGACTCCGTTTCTAGCCAAAAGCTCAGGGAAAGACGCAGCCTAGGGCTTC           |
| LHCB1.3-590-640-R                                          | GGTAAAGCAAGTCCCTCGGCCCTC C CCAATGGCCCATTTCTCGGACTCTG          |
| LHCB1.3-540-590-R                                          | TAGCCTTCAACGGCTCCCATCAAAAATAACTTGTGTGGGCCAAAATGGCCAA          |
| LHCB1.3-640-690-F                                          | CCGGTGGCAGCTTCGACCCATTGGGTTGGTACC GACCCAGAGGCATTTC            |
| LHCB1.3-690-740-R                                          | GAGAACATAGCCAATCTTCCGTTCTTGAGCTCCTTCACCTTCAACTCAGC            |
| LHCB1.3-750-800-F                                          | TTCTTCGTTCAAGCCATCGTCACTGGTAAGGGACCGATAGAGAACCTTGC            |
| LHCB1.3-800-850-F                                          | TGACCATTGGCCGATCCAGTTAAACAACAACGCATGGGCCCTTCGCCACCA           |
| CP5-100-150-R                                              | AGAATCGAGATAAGCCACTTGGGCCCTCAAACCCAACCAACCAAAACAC             |
| CP5-50-100-R                                               | CGGCAGCCACAGCAATCCAGAGTGGCGCAACAAAAACTATAAGGTCAGAG            |
| CP5-150-200-F                                              | AAACTCTTGTCCAATTCACTAAATTCCTCAATCTTCAGCTTCCCACCTTC            |
| CP5-370-430-R                                              | CAAACACAGTTCTGTACGGTACTGGGGAGGCCATTCTCAGGATCTCGCCTCAAAGCTT    |
| CP5-500-550-F                                              | GCTTTTGTATTCTTACTCTCGAGCGTTGCAAGGACACGGGCACTATGG              |
| CP5-340-370-F                                              | TGGACCGATCAACCCCAACCTTCTCATATC                                |
| CP5-280-340-R                                              | TCATTTGAATCCAACAAGGACCGCCATCTTTGACCTCAACCAACTTCCATAGATGCCTAA  |
| CP5-720-780-R                                              | TACCTCAGATGATGTTCATCTCACCATCGCCTCTTTTGTATTCAACTGCACGGATACACCA |
| CP5-940-990-R                                              | GCTTTAGCCCTCTGATATGCACGTAGGCCTGGCTCAATCTTCTTGACTGC            |
| CP5-650-700-F                                              | GAAAGTCCCCTTCTTTTGTAGCGACAGGGAGTATAATTATAGGCCGTCGT            |
| CP5-480-530-F                                              | TGGGCCTCCCCAGTACCGTAGCAGAACTGTGTTTGGAGATGCCACTCCCG            |
| CP5-430-480-F                                              | CGATCAACCCCAACCTTCTCATATCAAGCTTGGAGGCGAGATCCTGAGAA            |
| CP5-280-330-F                                              | GAAGAAAGGCTGGGGTTAACGTGGTGAGAAGAAGTTTGGAGATGGAAGT             |
| CP5-320-370-R                                              | CCTAAAATCATCGTCCGTTACAACCCAGTTTCTCTTTGGAAGAAGGC               |
| CP5-50-200-F                                               | CTCCCAAGACCCCAACCATCGGAGGGAGGGGGCGAGATGATGGATTGAGT            |
| HSP70-1-1030-1083-F                                        | GTGGTTCACCCGATCCCTAAGGTTCAAGCAATTGCTCCAGGACTTCTTCAAC          |
| HSP70-1-1130-1180-R                                        | CCTTCTCGTTTCTTACCCTGAGAAATAGCTCCCTGGACAGCAGCACC               |
| HSP70-1-1490-1530-F                                        | GGACAAGACCACCGGACAGAAGAACAGATCACCATCACC                       |
| HSP70-1-150-180-R                                          | ATTCTTAGCTGCGTCACCGATCAACCTCTC                                |
| HSP70-1-1560-1610-R                                        | TCCTCGTCTCGGACTTGTACTTCTCAGCCTCTTGAACCATCTTCTCAAT             |
| HSP70-1-1730-1680-R                                        | TCGATCTTCTTCTTGTCTGCAGCCGGGAGCTTCTCACC AATCTTCTCGTC           |
| HSP70-1-1760-1810-R                                        | CCTTCATCTTGTCTTTCGAACTCATCAGCCTCAGCCAAC TGGTTACCCTCG          |
| HSP70-1-1920-1950-R                                        | GACCTCCTCGATCTTAGGTCCAGCACC GCC                               |
| HSP70-1-220-260-R                                          | TGAACAGAGCTGTAGAGAAACGACGACCGGATCAACCTCT                      |
| HSP70-1-840-870-F                                          | TCTTCCACTGCTCAGACCACCATCGAGATT                                |
| HSP70-1-890-930-F                                          | CGACTTCTACTCCACCATCACCCGTGCTAG TTTGAGGAG                      |
| HSP70-1-980-1030-R                                         | CAACAAGGACAACATCATGAACAGTGTCTTGTCCATCTTAGCATCACGA             |
| HSP70-1-1960-2010-R                                        | ATCGTCCATACCAGAGGCACCTGGACCACCGGCTTCAACCACGACTCCTT            |
| HSP70-1-1750-1800-F                                        | TCGAGAACTACGCTTACAACATGAGGAACACCATCCAAGACGAGAAGATT            |
| HSP70-1-1240-1290-F                                        | GTGCTGCTGTCCAGGAGCTATTTCTCAGCGGTGAAGGAACGAGAAGGTT             |
| HSP70-1-1590-1640-R                                        | TTGGTGATGGTGATCTTGTCTTCTGTCCGGTGGTCTTGTCTCAGCAGA              |
| HSP70-1-1910-1960-F                                        | GATGAAGAAATGGAGAGCATCTGCAACCCAATCATTTGCCAAGATGTACC            |
| HSP70-1-1470-1520-R                                        | GGAATTCGGAGAGCTCAAATTTACCAAGAAGGTTGTTGTCTTGGTCTT              |
| HSP70-1-1070-1120-R                                        | GAACAGTCTTGTCCATCTTAGCATCACGAAGACACTTCTCAACTGGC               |
| AT5G20700-80-130-F                                         | AATCTGATCATCAAACTCTGCTCTCTCAAGATCATGCTTACTAAAAGAA             |
| AT5G20700-190-240-F                                        | CTCCTTTCTTCGACGCTCTTGTATGACGAGCCCTAAAAGCCACTGGATTTC           |
| AT5G20700-280-330-R                                        | GGCTACAATCCCTAGACCAACAGAGCCACC AAGATTGTATCGTAGAATC            |
| AT5G20700-330-380-R                                        | TCCGATCTACAACCGCTCGTGATTCGACGAGTGTTTGAGTCTCGAGCGC             |
| AT5G20700-430-490-R                                        | CCAACGTGTAATCTCTCTCGTCCATTATGAACATCTCCTCGTCTTCTCCGTCCTGCTTC   |
| AT5G20700-600-640-R                                        | CTGGCGAATTTCTTGAGATTCCGTAACGACATCGACCAC                       |
| AT5G20700-790-830-F                                        | GTAGATCAAAATTTCTCAACCTCTCCTTACACCGCCGGCCA                     |
| AT5G20700-840-880-R                                        | ATCAGTAGAAGAACTCCGGCTAAGTCACTAGA AACTCCGGT                    |
| AT5G20700-840-880-F                                        | ACCGGAGTTCTAGTACTTAGCCGGAGTTCTTCTACTGAT                       |
| AT5G20700-730-780-R                                        | CCTTTCATCATTTGCTATATGACTCGATCGACACTCTGTGCTGCAAAATG            |
| AT5G20700-670-720-R                                        | TCTGTAATAAATATGTCTTGACCATGAAGTTTCTTCTGCACAAGTAAC              |
| AT5G20700-530-580-R                                        | CATCGTTGATCTTACTTGGAGAACTCAAAACCATCTTTGTATATAAAC              |
| AT5G20700-480-530-F                                        | TACACGTTGGTGACATGCCACCATGGACCAAGTGGATCTTGTAAATAAAG            |
| AT5G20700-430-480-F                                        | GAAGCACGGACGGAGAAGACGAGGAGATGTTTATAATGGACGAGGAGGAT            |
| AT5G20700-330-380-F                                        | GCGCTCGAGAACTCAAACTCTGTCGAATCACGAGCGTTTGTAGATCGGA             |

**Table S1. Cont.**

| Primer or probe                                                                                   | Sequence (5'-3')                                  |
|---------------------------------------------------------------------------------------------------|---------------------------------------------------|
| AT5G20700-280-330-F                                                                               | GATTCTACGATGACAACTCTGGTGGCTCTGTGGTCTAGGGATTGTAGCC |
| 25S rRNA-4170-F                                                                                   | GGCCTTGCTGCCACGATCCACTGAGATTCAGCCCTTTGTC          |
| 25S rRNA-4130-F                                                                                   | ACGACTTAAATACGCGACGGGGTATTGTAAGTGGCAGAGT          |
| 25S rRNA-4070-F                                                                                   | GGTCGTTCCGACCGCCTTGAATTATAATTACCACCGAGCG          |
| 25S rRNA-4030-F                                                                                   | CCAAAGGCACGTGTCGTTGGCTAAGTCCGTTCCGGCGAAC          |
| 25S rRNA-3990-F                                                                                   | CCCCCGCCCGATTGCCGACCCCTCAGTAGGAGCTTAGGCT          |
| 25S rRNA-3950-F                                                                                   | CGCCTCTAAGTCAGAAATCCGGGCTAGAAGCGACGCATGC          |
| 25S rRNA-3910-F                                                                                   | CCAGTGGCGCGAAGCTACCGTGCCTGGATTATGACTGAA           |
| 25S rRNA-3860-F                                                                                   | CGAGAGGAACCGTTGATTTCGCACAATTGGTCATCGCGCTT         |
| 25S rRNA-3820-F                                                                                   | CCTACTGATGCCCGCTCGCGATAGTAATTCAACCTAGTA           |
| 25S rRNA-3690-F                                                                                   | TTGCTTTTGTATCCTTCGATGTGGCTCTTCTATCATTG            |
| 25S rRNA-3650-F                                                                                   | GGGATAACTGGCTTGTGGCAGCCAAGCGTTCATAGCGACG          |
| 25S rRNA-3550-F                                                                                   | TGATTCTGATTTTCAGTACGAATACGAACCGTGAAAGCGT          |
| 25S rRNA-3240-F                                                                                   | ACCCTGTTGAGCTTGACTCTAGTCCGACTTTGTGAAATGA          |
| 25S rRNA-3120-F                                                                                   | CCTCGTCATCTAATTAGTGACGCGCATGAATGGATTAACG          |
| 25S rRNA-3020-F                                                                                   | CCTCGTCATCTAATTAGTGACGCGCATGAATGGATTAACG          |
| 25S rRNA-2940-F                                                                                   | CAGAAGTGGTACGCGACAAGGGGAATCCGACTGTTTAATTA         |
| 25S rRNA-2800-F                                                                                   | GGGTCCCAGTTCGAAACCCGTCGGCTGTCAGCGGACTGCT          |
| 25S rRNA-2700-F                                                                                   | GGTGAACAGCCTCTGGTCGATGGAACAATGTAGGCAAGGG          |
| 25S rRNA-2650-F                                                                                   | CCGAGTGGCGCTCACGCCCGGTGTAATCATAACCGCATC           |
| miR167                                                                                            | TAGATCATGCTGGCAGCTTCA                             |
| ASRP255                                                                                           | TACGCTATGTTGGACTTAGAA                             |
| U6                                                                                                | AGGGCCATGCTAATCTTCTC                              |
| <b>Primers used for PCR amplification of cDNA probes to detect host mRNA by Northern blotting</b> |                                                   |
| <b>Primer</b>                                                                                     |                                                   |
| LHCB1.3-F                                                                                         | AACGGAGTCAAGTTCGGA                                |
| LHCB1.3-R                                                                                         | TCCCTTACCAGTGACGATG                               |
| CP5-F                                                                                             | GATGATGAGTTCGGTTCGA                               |
| CP5-R                                                                                             | GGTGTGATGTGAGCCATT                                |
| AT5G20700-F                                                                                       | TTCATAATGGACGAGGAGG                               |
| AT5G20700-R                                                                                       | CGGTGTAAGGAGAGGTTGAG                              |
| HSP70-1-F                                                                                         | GTGTCATCGCTGGTTTGA                                |
| HSP70-1-R                                                                                         | TGATGGTGGAGTAGAAGTCG                              |
| RBCS-1A-F                                                                                         | TACTATGGTTGCCTCTCCG                               |
| RBCS-1A-R                                                                                         | GCACTCTTCCACTTCTTCA                               |
| RCA-F                                                                                             | GAGGCAAGGTTCAAGGTAAA                              |
| RCA-R                                                                                             | ACGGATGAGAGGAGCGTAT                               |
| TUB2-F                                                                                            | CGAGTTGCGGTAGATTCTG                               |
| TUB2-R                                                                                            | AGAGTAGCGTTGTAAGGCTCA                             |
| <b>Primers used for obtaining cDNA fragments as probes to detect viral RNAs</b>                   |                                                   |
| <b>Primer</b>                                                                                     |                                                   |
| Fny-CMV-RNA2-F                                                                                    | TCTGTGGCGGGAGCTGAGTTGGC                           |
| Fny-CMV-RNA2-R                                                                                    | TGGTCTCCTTTTGGAGGCCCCAC                           |
| Q-CMV-RNA3-F                                                                                      | CGTCCGAAGACGTTAAACTAC                             |
| Q-CMV-RNA3-R                                                                                      | TGGTCTCCTTATGGAGAACTT                             |
| TuMV-CP-F                                                                                         | CGAACTGACGGAGGACAAA                               |
| TuMV-CP-R                                                                                         | TTCCATCCAAGCCGAACA                                |
| <b>Primers used for obtaining the cDNA fragment as probes to detect viral siRNAs</b>              |                                                   |
| <b>Primer</b>                                                                                     |                                                   |
| TuMV-CI-F                                                                                         | ACTCTCAATGATATAGAGGATG                            |
| TuMV-CI-R                                                                                         | TTGATGGTGAAGTGCCTCAAG                             |
| <b>Probes used for Northern blot detection of viral siRNAs</b>                                    |                                                   |
| <b>DNA oligo probe</b>                                                                            |                                                   |
| Q-CMV-RNA3-1-40-F                                                                                 | GTAATCTTACCCTTTCTTTTCAGTCGTCGCGTCAGTC             |
| Q-CMV-RNA3-241-280-F                                                                              | CGGATAACGCCATCTCTGTCAGACCTCTCGTTCCCAAGT           |
| Q-CMV-RNA3-741-780-F                                                                              | GCCGTCGCTCGCCTGTTGAAGTTCGAGTTAAACAACGTTA          |
| Q-CMV-RNA3-1041-1080-F                                                                            | GACGCGATGCCGCTTGAAGATTTCCCATCTGGGGTTAGTA          |
| Q-CMV-RNA3-1341-1380-F                                                                            | GACTCAATAAAACCCCTCGCCATTTGGTCGTCCTCACTTAA         |
| Q-CMV-RNA3-1641-1680-F                                                                            | CTATGTTTGGCGATGGTAACTCACCAGTTTGGTTTATCA           |
| Q-CMV-RNA3-2131-2170-F                                                                            | TACTCTGATATTACCAAGAGTGCAGGATTCGCCTGTGGTT          |
| Fny-CMV-RNA3-241-280-F                                                                            | TAGGCCGCGATCATTTGGATGCGCGCTGATAATGCTATTTT         |
| Fny-CMV-RNA3-741-780-F                                                                            | TTAGCTGAGCAAAACAAACCGTCAGCTGTCGCTCGCCTGT          |

**Table S1. Cont.**

| Primer or probe          | Sequence (5'-3')                         |
|--------------------------|------------------------------------------|
| Fny-CMV-RNA3-1041-1080-F | AGTAGACATCTGTGACGCGATGCCGTGTTGAGAAGGGAAC |
| Fny-CMV-RNA3-1341-1380-F | GATGCTAACTTTAGAGTCTTGTCCGACAGCTTTCGCGAC  |
| Fny-CMV-RNA3-1600-1640-F | GAAATTTGATTCTACCGTGTGGGTGACAGTCCGTAAAGTT |
| Fny-CMV-RNA3-1681-1710-F | TGTTCCGGACGGAGCCTCACCGGTACTGG            |
| Fny-CMV-RNA3-1731-1770-F | GGAGTCCAAGCCAACAACAACTGTTGTATGATCTTTCGG  |

## Other Supporting Information Files

[Dataset S1 \(XLS\)](#)
